# Supplementary material
Source: HighWire-hosted journal article supplement (http://www.qdcxjkg.com/highwire/filestream/113804/field_highwire_adjunct_files/0/supplementary_materials.pdf)
Supplement: supplementary_materials.pdf [file supplementary_materials.pdf]

## Online Supplementary information:

### Fixed Dose Combination Anti-tuberculosis Therapy: A Systematic Review and Meta-Analysis

<sup>1</sup>Amr S Albanna, M.D.; <sup>1</sup>Benjamin M Smith, M.D.; <sup>2</sup>Deanna Cowan, M.L.S.; <sup>1</sup>Dick Menzies, M.D.,

<sup>1</sup>Respiratory Epidemiology and Clinical Research Unit, Montreal Chest Institute, McGill University; <sup>2</sup>Life Sciences Library, McGill University

#### Literature Searches

Literature searches were conducted in the following databases:

- Medline (Ovid platform)
- Medline In-Process or other Non-Indexed Citations (Ovid platform)
- Embase (Ovid platform)
- Cochrane Library (published by Wiley) which includes Cochrane Reviews, DARE, and Central Register of Controlled Clinical Trials. The Cochrane Infectious Diseases Group Specialized Register was double-checked separately.
- LILACS (BIREME - PAHO – WHO Latin-American and Caribbean Center on Health Sciences Information)

Search terms included both subject headings, where available, and textwords (ie words in titles, subjects, abstracts, substance terms, etc.)

|   | Medline (Ovid) – MeSH terms in upper case;<br>other terms are keywords (.mp)                                                                                                                                                                                                                   | Embase (Ovid) – Embase terms in upper case;<br>other terms are keywords (.mp)                                                                                                                                                                                                                  |
|---|------------------------------------------------------------------------------------------------------------------------------------------------------------------------------------------------------------------------------------------------------------------------------------------------|------------------------------------------------------------------------------------------------------------------------------------------------------------------------------------------------------------------------------------------------------------------------------------------------|
| 1 | EXP TUBERCULOSIS/DT <i>or</i><br>EXP ANTITUBERCULAR AGENTS <i>or</i><br>MYCOBACTERIUM TUBERCULOSIS/DE<br><br><i>or</i><br>tuberculosis <i>and</i><br>drug <i>adj</i> (therapy <i>or</i> effect*) <i>or</i><br>antitubercul* <i>or</i> tuberculostatic <i>or</i><br>(anti <i>adj</i> tubercul*) | EXP TUBERCULOSIS/DT <i>or</i><br>EXP TUBERCULOSTATIC AGENT <i>or</i><br>MYCOBACTERIUM TUBERCULOSIS/DT<br><br><i>or</i><br>tuberculosis <i>and</i><br>drug <i>adj</i> (therapy <i>or</i> effect*) <i>or</i><br>antitubercul* <i>or</i> tuberculostatic <i>or</i><br>(anti <i>adj</i> tubercul*) |
| 2 | isoniazid <i>and</i> (rifampin <i>or</i> rifampicin)                                                                                                                                                                                                                                           | isoniazid <i>and</i> (rifampin <i>or</i> rifampicin)                                                                                                                                                                                                                                           |
| 3 | DRUG COMBINATIONS<br><i>or</i><br>fdc <i>or</i> 4fdc <i>or</i> 3fdc<br><i>or</i><br>(fixed <i>or</i> multiple <i>or</i> combin*) <i>adj3</i> (drug* <i>or</i><br>dose* <i>or</i> dosage* <i>or</i> formula* <i>or</i> preparat* <i>or</i><br>regimen*)                                         | DRUG COMBINATION<br><i>or</i><br>fdc <i>or</i> 4fdc <i>or</i> 3fdc<br><i>or</i><br>(fixed <i>or</i> multiple <i>or</i> combin*) <i>adj3</i> (drug* <i>or</i><br>dose* <i>or</i> dosage* <i>or</i> formula* <i>or</i> preparat* <i>or</i><br>regimen*)                                          |
| 4 | 1980-current <i>and</i><br>human                                                                                                                                                                                                                                                               | 1980-current <i>and</i><br>human                                                                                                                                                                                                                                                               |
|   | 1 <i>and</i> 2 <i>and</i> 3 <i>and</i> 4: 1716 hits (July 27, 2011)                                                                                                                                                                                                                            | 1 and 2 and 3 and 4: 1271 hits (July 28, 2011)                                                                                                                                                                                                                                                 |

|   | Medline In-Process – all textwords                                                                                                                                                                                   | Cochrane Library - MeSH terms in upper case; other terms "textword"                                                                                                                                                                                              |
|---|----------------------------------------------------------------------------------------------------------------------------------------------------------------------------------------------------------------------|------------------------------------------------------------------------------------------------------------------------------------------------------------------------------------------------------------------------------------------------------------------|
| 1 | tuberculosis                                                                                                                                                                                                         | EXP TUBERCULOSIS/DT<br>EXP ANTITUBERCULAR AGENTS<br>MYCOBACTERIUM TUBERCULOSIS/DE<br><br><i>or</i><br>tuberculosis <i>and</i><br>drug <i>NEXT</i> (therapy or effect*) <i>or</i> antitubercul* <i>or</i><br>tuberculostatic <i>or</i> anti <i>NEXT</i> tubercul* |
| 2 | drug adj (therapy <i>or</i> effect*) <i>or</i><br>antitubercul* <i>or</i> tuberculostatic <i>or</i> (anti adj<br>tubercul*)                                                                                          |                                                                                                                                                                                                                                                                  |
| 3 | isoniazid <i>and</i> (rifampin <i>or</i> rifampicin)                                                                                                                                                                 | isoniazid <i>and</i> (rifampin <i>or</i> rifampicin)                                                                                                                                                                                                             |
| 4 | fdc <i>or</i> 4fdc <i>or</i> 3fdc<br><i>or</i><br>(fixed <i>or</i> multiple <i>or</i> combin*) <i>adj3</i> (drug*<br><i>or</i> dose* <i>or</i> dosage* <i>or</i> formula* <i>or</i><br>preparat* <i>or</i> regimen*) | DRUG COMBINATIONS<br><i>or</i><br>fdc <i>or</i> 4fdc <i>or</i> 3fdc<br><i>or</i><br>(fixed <i>or</i> multiple <i>or</i> combin*) <i>NEAR/3</i> (drug* <i>or</i> dose*<br><i>or</i> dosage* <i>or</i> formula* <i>or</i> preparat* <i>or</i> regimen*)            |
| 5 | (limits n/a)                                                                                                                                                                                                         | 1980-2011                                                                                                                                                                                                                                                        |
|   | 1 <i>and</i> 2 <i>and</i> 3 <i>and</i> 4: 11 hits (July 28,<br>2011)                                                                                                                                                 | 1 <i>and</i> 3 <i>and</i> 4 <i>and</i> 5: 258 hits (July 27, 2011)<br>Cochrane Reviews = 10<br>DARE = 5<br>CCRCT = 232<br>Economic Evaluations = 10                                                                                                              |

|                                                                                                                     |                                                      |
|---------------------------------------------------------------------------------------------------------------------|------------------------------------------------------|
| LILACS ( <a href="http://lilacs.bvsalud.org/en/">http://lilacs.bvsalud.org/en/</a> ) – all terms searched as “word” |                                                      |
| 1                                                                                                                   | tubercul\$ <i>or</i><br>antitubercul\$               |
| 2                                                                                                                   | isoniazid <i>and</i> (rifampin or rifampicin)        |
| 3                                                                                                                   | combin\$ <i>or</i> fdc                               |
|                                                                                                                     | 1 <i>and</i> 2 <i>and</i> 3: 38 hits (July 27, 2011) |

All results were exported to EndNote™ Bibliographic Management software. Approximately 2450 references were retained after duplicates were removed.

**Table S1.** Summary of the included cohort and non-comparative studies.

| Author                                                                   | Public. year | Study place  | Age (Mean) | Male (%) | Treat. regimen    | FDC formula        | DOT | Allocation sequence <sup>a</sup> | Follow-up completion <sup>b</sup> | Non-selective outcomes <sup>c</sup> | Free of bias <sup>d</sup> |
|--------------------------------------------------------------------------|--------------|--------------|------------|----------|-------------------|--------------------|-----|----------------------------------|-----------------------------------|-------------------------------------|---------------------------|
| <b>Non-comparative RCTs ( no direct comparison between FDC and SDF )</b> |              |              |            |          |                   |                    |     |                                  |                                   |                                     |                           |
| Brändli et al <sup>1,2</sup>                                             | 1993         | Switzerland  | 48         | 71       | HR±Z <sup>e</sup> | Rifater/Rimactazid | NS  | Unclear                          | Yes                               | Unclear                             | Yes                       |
| Punnotok et al <sup>3</sup>                                              | 1995         | Thailand     | 35         | 68       | HRZ               | Rifater/Rifinah    | No  | Yes                              | Yes                               | Yes                                 | Yes                       |
| <b>Cohort studies</b>                                                    |              |              |            |          |                   |                    |     |                                  |                                   |                                     |                           |
| Churchyard et al <sup>4</sup>                                            | 2000         | South Africa | 41         | NS       | HRZ               | NS                 | Yes | Yes                              | Unclear                           | Yes                                 | Unclear                   |
| Sokolova et al <sup>5</sup>                                              | 2002         | Russia       | NS         | NS       | HRZE              | Myrin P            | NS  | Unclear                          | Unclear                           | Unclear                             | Unclear                   |

**Abbreviations:** FDC, fixed dose combination; DOT, direct observed therapy; H, isoniazid; R, rifampicin; Z, pyrazinamide; NS, not specified.

**Notes:** <sup>a</sup> Consequence of subject recruitment; <sup>b</sup> Complete follow up for at least 75% of subjects, and assessment of the reasons for incomplete follow up; <sup>c</sup> free of selective outcome (i.e. reporting all expected or pre-specified outcomes); <sup>d</sup> equivalent subject characteristics and management between comparison groups, and the sample population has no specific risks that could influence their treatment outcomes; <sup>e</sup> either 9 months HR regimen or 6 months HRZ regimen.

**Table S2.** Individual study results of the comparative cohort and non-comparative studies.

| Outcomes                                               | No. of studies | FDC group       |                 | Separate drug formula group |                  | RR (95%CI) <sup>a</sup> |
|--------------------------------------------------------|----------------|-----------------|-----------------|-----------------------------|------------------|-------------------------|
|                                                        |                | No. of subjects | % (95% CI)      | No. of subjects             | % (95% CI)       |                         |
| Treatment failure or disease relapse                   |                |                 |                 |                             |                  |                         |
| <i>Sokolova et al (cohort) –DS</i>                     | 1              | 258             | 5 (2.7, 8.5)    | 110                         | 10.9 (5.9, 18.3) | 0.46 (0.2, 0.98)        |
| <i>Sokolova et al (cohort) –DR</i>                     | 1              | 19              | 21 (6, 46)      | 87                          | 35 (25, 45)      | 0.61 (0.24, 1.53)       |
| <i>Brändli et al (non-comparative) <sup>b</sup></i>    | 1              | 213             | 0.5 (0.01, 2.6) | No comparative group        |                  |                         |
| <i>Punnotok et al (non-comparative)</i>                | 1              | 97              | 2 (0.3, 7.3)    | No comparative group        |                  |                         |
| <i>Churchyard et al (non-comparative) <sup>b</sup></i> | 1              | 1888            | 1.5 (1, 2)      | No comparative group        |                  |                         |
| Acquired drug resistance                               |                |                 |                 |                             |                  |                         |
| <i>Brändli et al (non-comparative) <sup>b</sup></i>    | 1              | 213             | 0 (0, 1.7)      | No comparative group        |                  |                         |
| <i>Churchyard et al (non-comparative) <sup>b</sup></i> | 1              | 1888            | 0.26 (0.1, 0.6) | No comparative group        |                  |                         |
| TB culture conversion after 2 months of treatment      |                |                 |                 |                             |                  |                         |
| <i>Punnotok et al (non-comparative)</i>                | 1              | 97              | 99 (94, 100)    | No comparative group        |                  |                         |
| Adverse drug reaction                                  |                |                 |                 |                             |                  |                         |
| <i>Punnotok et al (non-comparative)</i>                | 1              | 98              | 32 (23, 42)     | No comparative group        |                  |                         |
| Patients' adherence to treatment                       |                |                 |                 |                             |                  |                         |
| <i>Churchyard et al (non-comparative) <sup>c</sup></i> | 1              | 1601            | 99.5 (99, 100)  | No comparative group        |                  |                         |

**Abbreviations:** FDC, fixed dose combination; CI, confidence interval; RR, risk ratio; DS, drug sensitive; DR, drug resistant; TB, tuberculosis. **Notes:** <sup>a</sup> RR measurements are limited to the comparative cohort; <sup>b</sup> drug resistant TB cases were excluded; <sup>c</sup> assessment of adherence was based on the duration of treatment interruption (less than 2 months).

### Supplementary references:

1. Brändli O, Dreher D, Morger D. [Results of short-term tuberculosis therapy with isoniazid, rifampicin and pyrazinamide]. *Schweiz Med Wochenschr.* 1993 Jun 26;123(25):1300-6.
2. Brändli O, Haegi V, Villiger B, Bohn W, Baumann HR, Zäch R. [Short-term therapy of lung tuberculosis using a fixed combination of isoniazid, rifampicin and pyrazinamide. Results after 2 years]. *Schweiz Med Wochenschr.* 1989 Mar 11;119(10):299-305.
3. Punnotok J, Pumprueg U, Chakorn T. A comparison of two short course tuberculosis chemotherapy regimens, both using Rifater during an intensive phase, with a 3 year follow-up. *J Med Assoc Thai.* 1995 Jun;78(6):298-304.
4. Churchyard GJ, Corbett EL, Kleinschmidt I, Mulder D, De Cock KM. Drug-resistant tuberculosis in South African gold miners: incidence and associated factors. *Int J Tuberc Lung Dis.* 2000 May;4(5):433-40.
5. Sokolova GB, Semenova OV, Bogadel'nikova IV, Kunichan AD, Zeligier LR, Elistratova NA. [Myrin P in the combined treatment of tuberculosis]. *AntibiotKhimioter.* 2002;47(6):22-7.
